# Supplementary figures and images for: Titanium Dioxide Nanoparticles Induce Maternal Preeclampsia-like Syndrome and Adverse Birth Outcomes via Disrupting Placental Function in SD Rats
Source: MDPI journal article supplement (doi:10.3390/toxics12050367), 2024-05-16

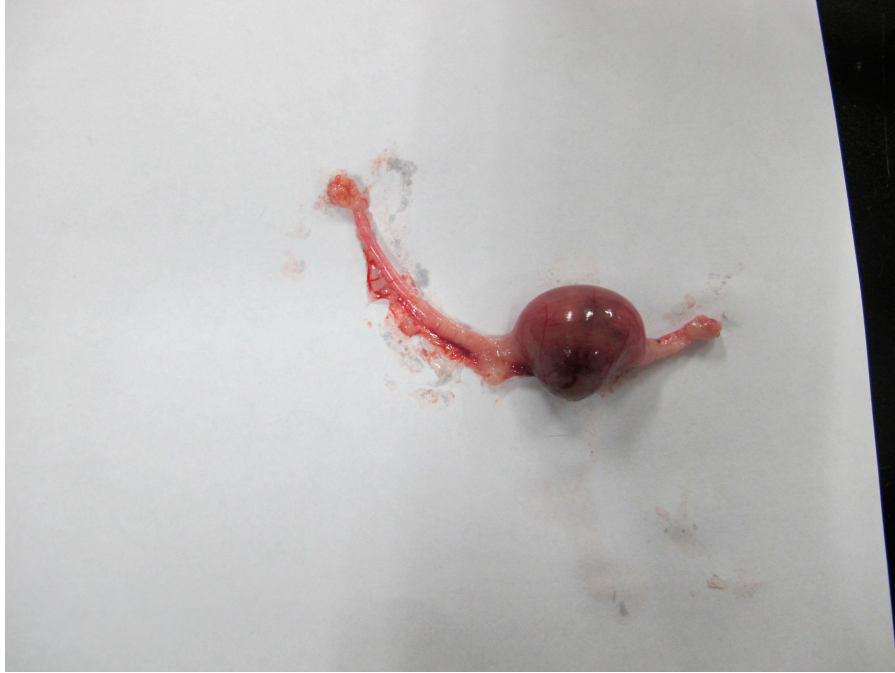

Figure S1: The image of the maternal uterus that carried single pregnancy.

Supplement: s1 [file s1]
